# Supplementary material
Source: PubMed Central journal article supplement (PMC5004967)
Supplement: JCI79434.sd.pdf [file JCI79434.sd.pdf]

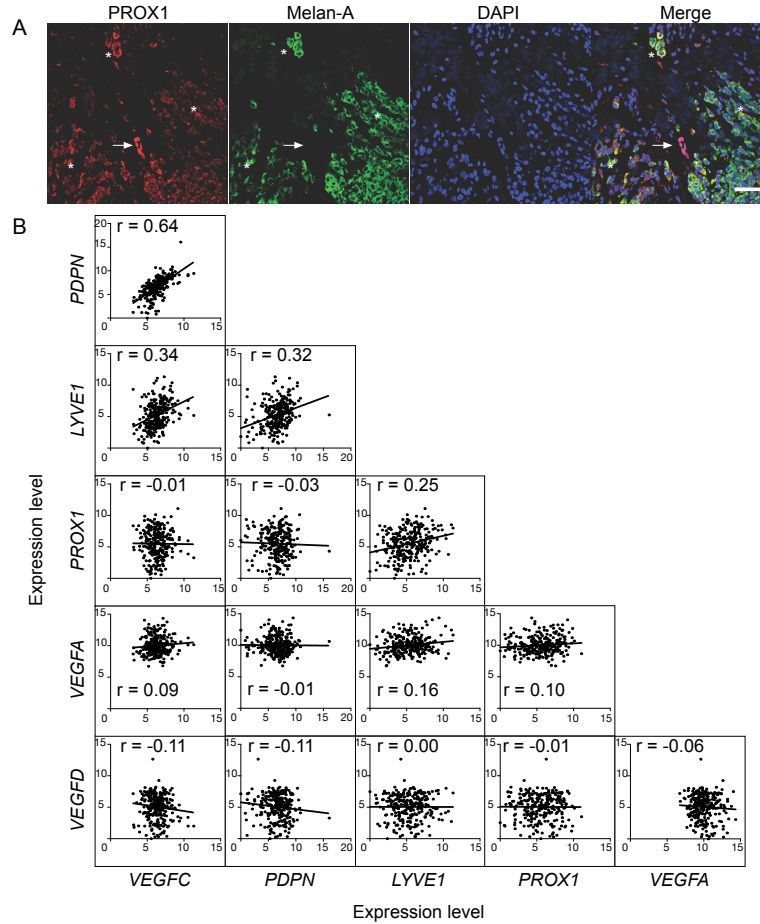

**Supplemental Figure 1. Correlation of lymphatic markers from human metastatic melanoma samples.** **A.** Immunofluorescence detection of PROX1<sup>+</sup>Melan-A<sup>+</sup> cells in primary human cutaneous melanoma. Nuclear PROX-1 staining consistent with lymphatic vessel staining (Melan-A<sup>-</sup>, arrow) and cytoplasmic staining in Melan-A<sup>+</sup> cells (\*). PROX1, red; Melan-A, green; DAPI, blue. Scale bar = 50 $\mu$ m. **B.** Correlation of lymphatic markers (*LYVE1*, *PDPN*, *PROX1*) with each other and with vascular endothelial growth factor genes (*VEGFA*, *VEGFB*, *VEGFC*, *VEGFD*). 266 metastatic cutaneous melanoma samples from the Broad Institute's TCGA database. Pearson's correlation coefficient ( $r$ ).

Supplemental Figure 2

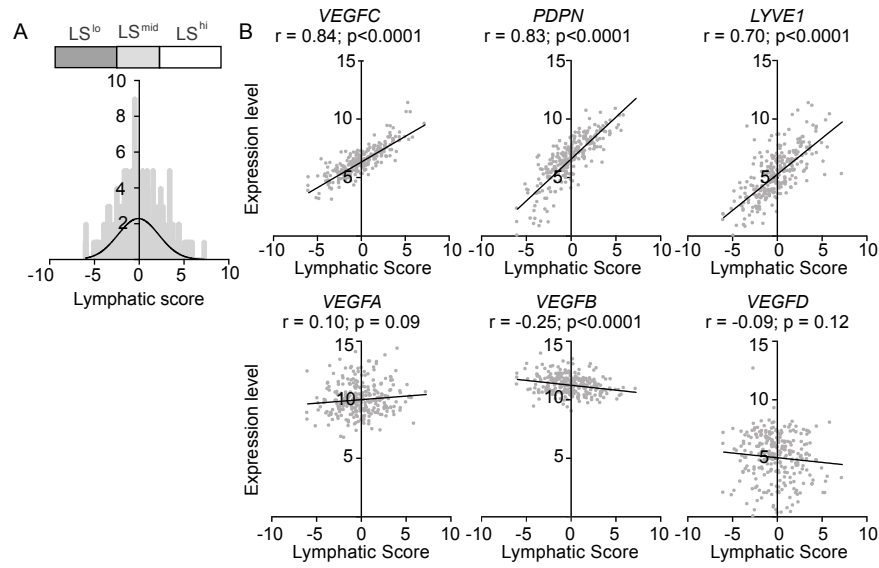

**Supplemental Figure 2. The lymphatic score correlates with the lymphangiogenic growth factor *VEGFC* and not *VEGFA*, *VEGFB* or *VEGFD*.** **A.** Distribution of lymphatic scores. **B.** Correlation of lymphatic score (LS) with *VEGFC*, *PDPN*, *LYVE1*, *VEGFA*, *VEGFB*, and *VEGFD* expression in 266 metastatic cutaneous melanoma samples. Pearson's correlation coefficient ( $r$ ).

Supplemental Figure 3

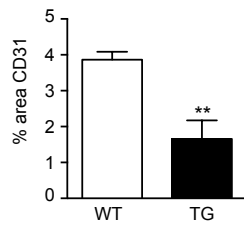

**Supplemental Figure 3. Quantification of percent area of CD31 staining.** A. Quantification of percent area of CD31<sup>+</sup> pixels quantified over total image area from immunohistochemical staining in paraffin sections. Data represented as mean ± SEM, n=3, \*\*p<0.05.

Supplemental Figure 4

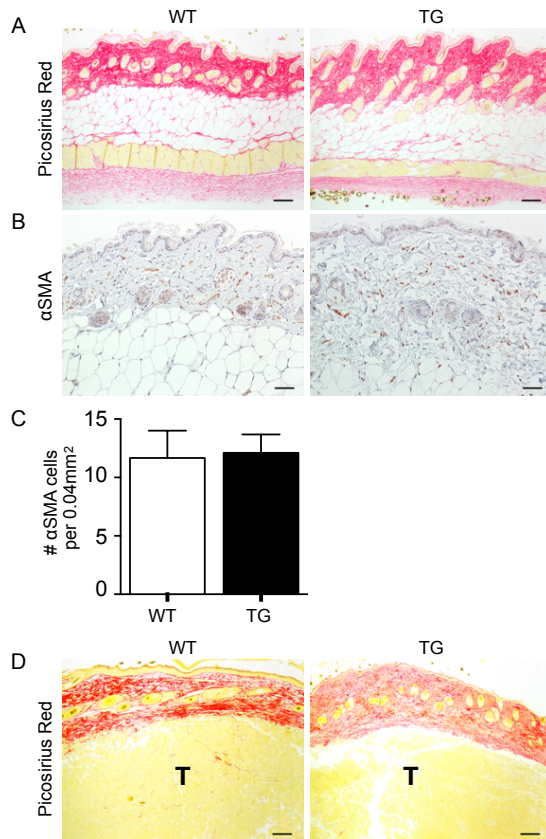

**Supplemental Figure 4. K14-VEGFR3-Ig mice do not exhibit enhanced cutaneous fibrosis as compared to wildtype littermates.** **A.** Picosirius Red staining was performed on skin taken from naïve wildtype (WT) and K14-VEGFR3-Ig (TG) mice. Collagen fibers are stained red; scale bar = 100μm. **B.** Immunohistochemistry for α-SMA in naïve skin from WT and TG mice (scale bar = 50μm) and **C.** quantification of number of α-SMA<sup>+</sup> cells per 0.04mm<sup>2</sup>; n=3. Data represented as mean ± SEM, n=3. **D.** Picosirius Red staining in B16F10 tumor implanted intradermal in WT and TG mice. Scale bar = 100μm; “T” marks tumor.

Supplemental Figure 5

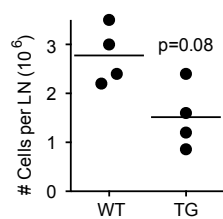

**Supplemental Figure 5. Lymph node cellularity in wildtype and K14-VEGFR3-Ig mice.** Brachial lymph node cellularity (naïve) in WT and TG mice, n=4. P-values were obtained with Student's unpaired t test.

Supplemental Figure 6

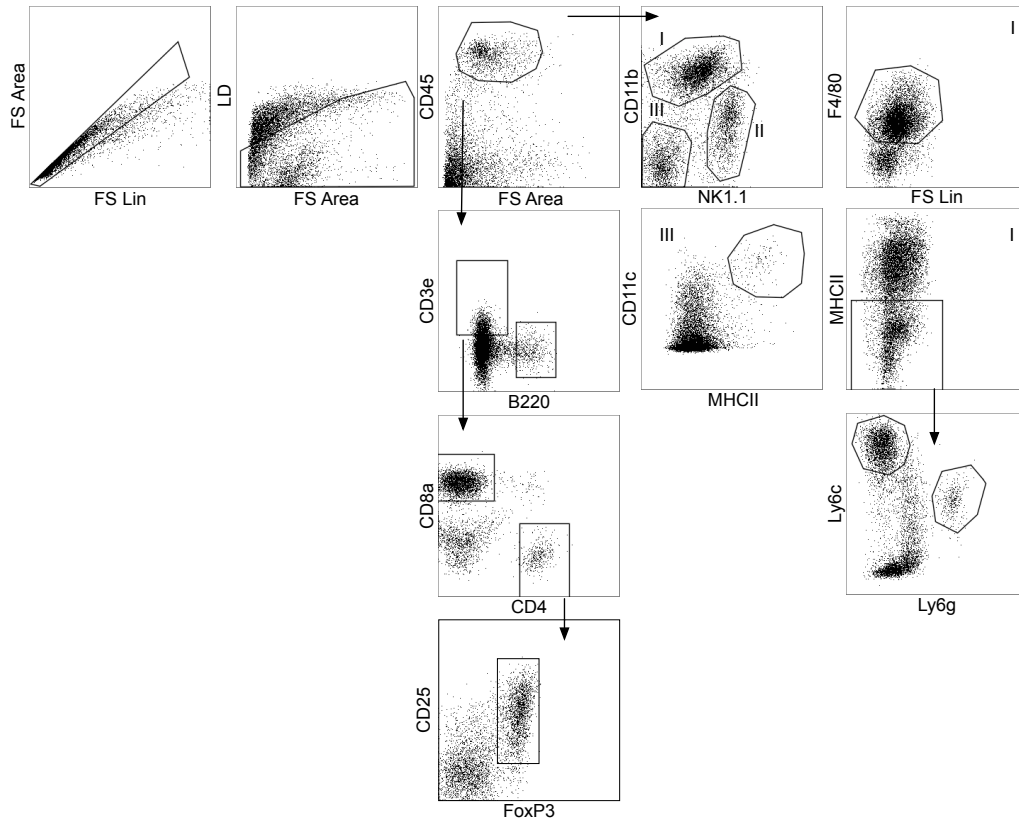

**Supplemental Figure 6. Gating scheme for analysis of infiltrating immune populations by flow cytometry.** Multi-color flow cytometry gating scheme to quantify immune populations in tumor, spleen and draining lymph node. Representative plots from the tumor of wildtype mouse.

Supplemental Figure 7

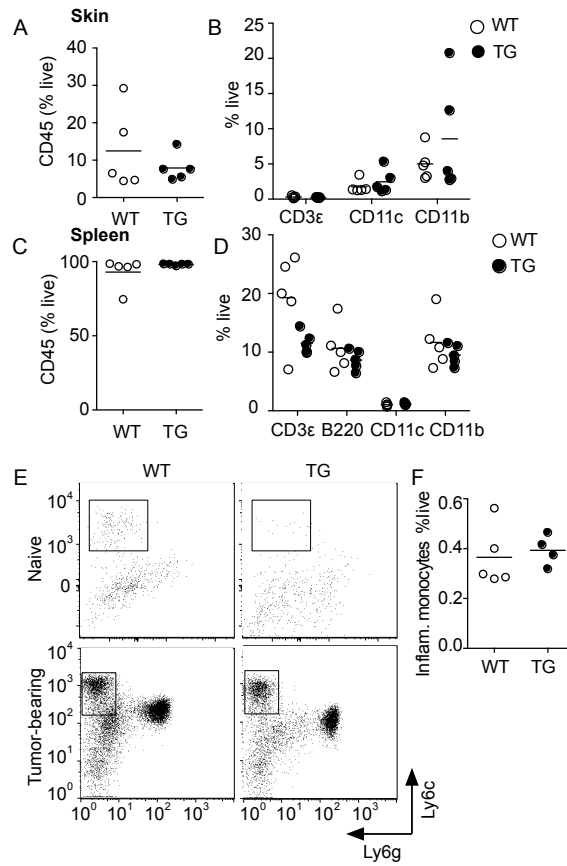

**Supplemental Figure 7. Homeostatic cutaneous immune populations in wildtype and K14-VEGF3-Ig mice.** Naïve skin and spleens were digested and analyzed by flow cytometry for immune populations from wildtype (WT) and K14-VEGFR3-Ig (TG) mice. **A.** Total CD45<sup>+</sup> cells as a percent of live cells and **B.** CD3ε, CD11c and CD11b cells as a percent of CD45<sup>+</sup> cells are quantified from the skin and **C** and **D.** spleens of mice. **E.** Representative plots of Ly6c<sup>+</sup> and Ly6g<sup>+</sup> populations in spleens of naïve and tumor-bearing mice and **F.** quantification of % Ly6c<sup>+</sup>Ly6g<sup>-</sup> inflammatory monocytes in naïve spleens, n≥4. Quantification of tumor-bearing mice in Figure 3. Gated on CD45<sup>+</sup>CD11c<sup>-</sup>CD11b<sup>+</sup>F4/80<sup>-</sup> inflammatory monocytes.

Supplemental Figure 8

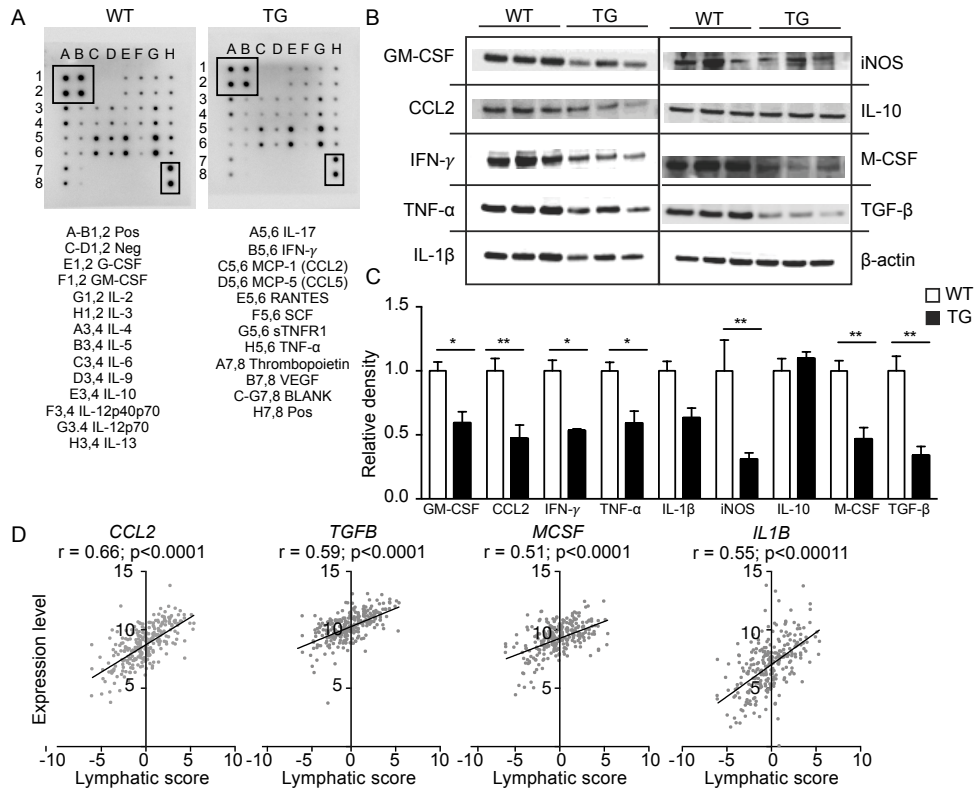

**Supplemental Figure 8. Correlation between lymphatic involvement and intratumoral cytokine expression.** **A.** Representative blot (above) and key (below) from cytokine array,  $n=7$ . Black squares indicate control IgG spots used for relative intensity calculations. Quantification presented in Figure 3. **B.** Representative western blots on tumor lysate and **C.** quantification of optical density normalized to WT ( $n=3$ ); data are represented as mean  $\pm$  SEM. P-values were obtained with Student's unpaired t tests of values. \* $p < 0.05$ , \*\* $p < 0.01$ . **D.** Representative plots correlate expression of key cytokines (*CCL2*, *TGFB*, *MCSF*, *IL1B*) with lymphatic score in 266 cutaneous metastatic melanoma samples from the Broad Institute TCGA database. Pearsons correlation coefficient ( $r$ ).

Supplemental Figure 9

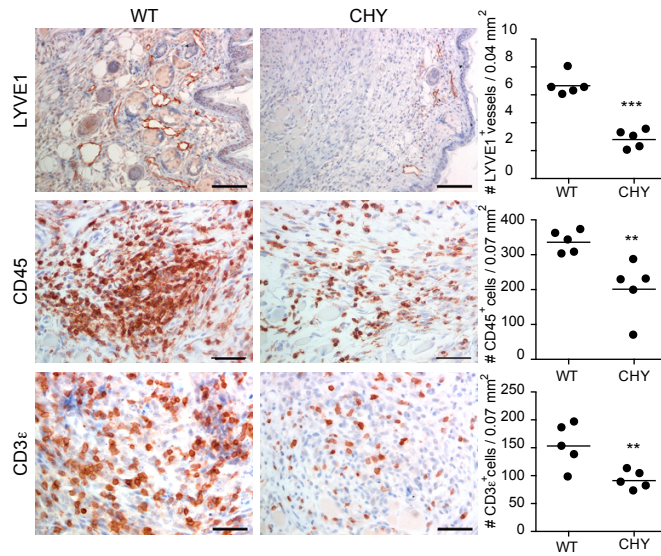

**Supplemental Figure 9. *Chy* mice demonstrate decreased dermal lymphatic vessel density and leukocytic infiltrate.** C3BHA syngeneic breast carcinoma cells were injected intradermal (n=5) into ears of *Chy* mice harboring an inactivating mutation in the tyrosine kinase domain of VEGFR3. Lymphatic vessel density (LYVE1; 20x scale bar=100μm) and leukocytic infiltrate (CD45 and CD3ε; 40x scale bar=50μm) were evaluated by immunohistochemistry (left) and quantified as number per area (right). P-values were obtained with Student's unpaired t tests of values. \*\*p≤0.01 \*\*\*p<0.001.

Supplemental Figure 10

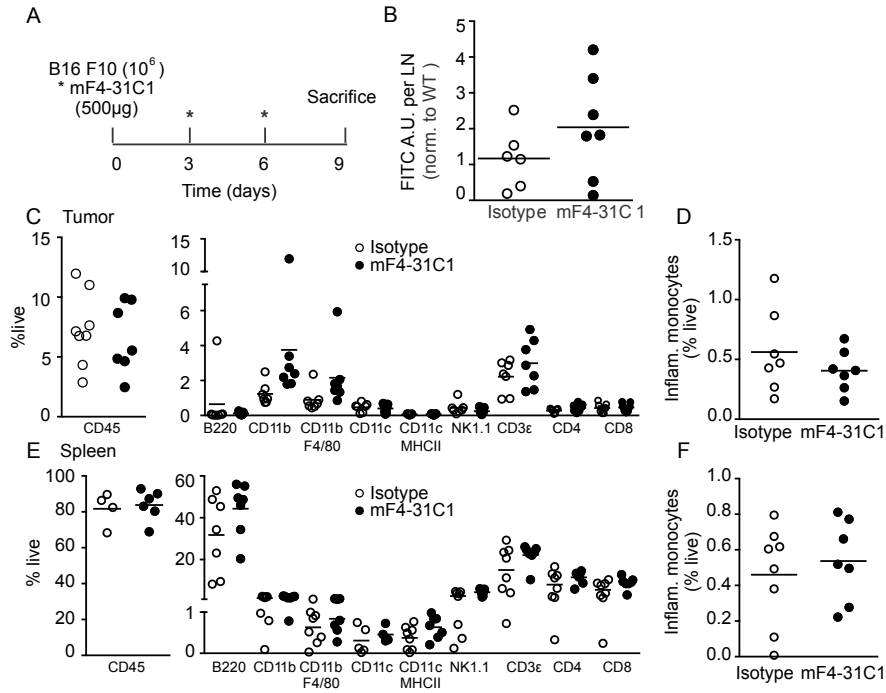

**Supplemental Figure 10. Inhibition of VEGFR3 signaling during tumor progression is insufficient to suppress local inflammation in wildtype mice.** **A.** B16F10 tumors were implanted into wildtype mice and treated with either VEGFR3 neutralizing antibody (mF4-31C1, Eli Lilly and Company, 500 $\mu$ g) or rat IgG isotype control on day 0, 3 and 6 to inhibit active VEGF-C signaling during tumor development. **B.** Fluid drainage was assessed by intratumoral injection of 70kDa FITC dextran and analysis of tumor draining lymph node 30 min later. (n=5) Relative numbers of tumor-associated **C.** CD45<sup>+</sup> cell populations and **D.** inflammatory monocytes (CD11c<sup>+</sup>CD11b<sup>+</sup>F4/80<sup>+</sup>Ly6c<sup>hi</sup>Ly6g<sup>-</sup>), quantified as a percent of live cells in the tumor. Relative numbers of splenic (**E**) CD45<sup>+</sup> cell populations and **F.** inflammatory monocytes (CD11c<sup>+</sup>CD11b<sup>+</sup>F4/80<sup>+</sup>Ly6c<sup>hi</sup>Ly6g<sup>-</sup>) (n=5). Data represented as mean  $\pm$  SEM.
